# Supplementary material
Source: PubMed Central journal article supplement (PMC3659944)
Supplement: supp_2012.065995_2012_065995-Contributions.pdf [file supp_2012.065995_2012_065995-Contributions.pdf]

**Manuscript no. HAEMATOL/2012/065995 entitled “A phase II study of lenalidomide in patients with extranodal marginal zone B-cell lymphoma of the mucosa associated lymphoid tissue (MALT-lymphoma) “**

**Authors: Barbara Kiesewetter, Marlene Troch, Werner Dolak, Leonhard Müllauer, Julius Lukas, Christoph C Zielinski and Markus Raderer**

**Information about the contributions of each person named as having participated in the study**

**1) Guarantor(s), i.e., person(s) who is (are) responsible for the integrity of the work as a whole:**

- Markus Raderer, Medical University Vienna, Dept. Internal Medicine I / Onoclogy
- Barbara Kiesewetter, Medical University Vienna, Dept. Internal Medicine I / Onoclogy

According to the International Committee of Medical Journal Editors (ICMJE)

([http://www.icmje.org/ethical\\_1author.html](http://www.icmje.org/ethical_1author.html)): “Authorship credit should be based on: 1) substantial contributions to conception and design, acquisition of data, or analysis and interpretation of data; 2) drafting the article or revising it critically for important intellectual content; and 3) final approval of the version to be published. Authors should meet conditions 1, 2, and 3 ..... Acquisition of funding, collection of data, or general supervision of the research group alone does not constitute authorship”.

**The guarantors of this manuscript confirm that all persons designated as authors qualify for authorship, and that each author has participated sufficiently in the work to take public responsibility for appropriate portions of the content.**

**2) Authors who participated in the conception of the study: Markus Raderer**

**3) Design & Methods. The following authors were responsible for specific investigations:**

- Markus Raderer: concept, acquisition of funding, protocol and performance of study

**4) Results. The following authors were responsible for specific portions of the results, including figures and tables:**

- Markus Raderer was responsible for performance of the study, data collection, analysis of data and interpretation
- Barbara Kiesewetter was responsible for data collection, analysis of data and interpretation, including design and conception of tables
- Marlene Troche was responsible for data collection and analysis of data
- Werner Dolak was responsible for data collection of GI-endoscopic examinations and consecutive interpretation
- Leonhard Müllauer was responsible for assessment of histologies and interpretation
- Julius Lukas was responsible for data collection and evaluation of ocular MALT-lymphoma patients and consecutive interpretation
- Christoph C. Zielinski was responsible for data collection and analysis of data

**5) Writing the manuscript. The following authors were responsible for writing the manuscript:**

- Barbara Kiesewetter and Markus Raderer were responsible for drafting, writing and proof reading of the manuscript including tables and approved the final version to be published
- Marlene Troch, Werner Dolak, Leonhard Müllauer, Julius Lukas and Christoph C Zielinski were responsible for writing and proof reading of the manuscript and approved the final version to be published

**6) Contributors Listed in Acknowledgments: (Examples of those who might be acknowledged include a person who provided purely technical help, writing assistance, or a department chair who provided only general support. Corresponding authors must declare whether they had assistance with the study design, data collection, data analysis, or manuscript preparation. If such assistance was available, the authors must disclose the identity of the individuals who provided this assistance and the entity that supported it. Financial and material support should also be acknowledged.)**

Not applicable
